# Supplementary material
Source: HighWire-hosted journal article supplement (https://bmjopenquality.bmj.com/highwire/filestream/135952/field_highwire_adjunct_files/1/ds3005.docx)
Supplement: ds3005.docx [file ds3005.docx]

| **TABLE 2: Handover Reassessment** | | | |
| --- | --- | --- | --- |
| **Audit Criteria** | **Percentage of Handovers containing the relevant information at:** | | |
| **Baseline (n=105)** | **Immediate**  **Post-Implementation (n=108)** | **Long Term**  **Post-Implementation (n=160)** |
| A day the task was to be completed | 73% | 87% | 99% |
| A list of current problems / differential diagnoses | 47% | 94% | 96% |
| The patient’s relevant past medical history | 9% | 64% | 81% |
| The actual task to be completed | 95% | 99% | 99% |
| An indication for the task to be completed | 63% | 94% | 95% |
| The plan/action to be taken as a result of the task once completed | 43% | 74% | 84% |
| Whether junior doctors felt the handover was subjectively clear | 51% | 91% | 91% |

*Table 2: Audit results of handovers on the original electronic handover system verses the immediate and long term results post-implementation of our revised system. This illustrates the percentage of handovers that contained the information relevant to the corresponding pre-entered handover subheadings.*
